# Supplementary material
Source: PubMed Central journal article supplement (PMC2577263)
Supplement: pp.108.125468_1.pdf [file pp.108.125468_1.pdf]

**Table S1.** Primer sequences for semi-quantitative RT-PCR.

|                 |                                |
|-----------------|--------------------------------|
| <i>UBQ</i> – F  | GATCTTTGCCGGAAAACAATTGGAGG     |
| <i>UBQ</i> – R  | CGACTTGTCATTAGAAAGAAAGAGAT     |
| <i>FLC</i> – F  | TTCTCCAAACGTCGCAACGGTCTC       |
| <i>FLC</i> – R  | GATTTGTCCAGCAGGTGACATCTC       |
| <i>FT</i> – F   | CTCAGGAACTTCTATACTTTGGTTATG    |
| <i>FT</i> – R   | CTGACAATTGTAGAAAACCTGCG        |
| <i>TSF</i> – F  | CTTGATCCTTTCACGAGGTTGG         |
| <i>TSF</i> – R  | GGCAGTTGAAGTAAGAGGCA           |
| <i>FLM</i> – F  | CTCCGGTGACGACATTTCCAAGATCAT    |
| <i>FLM</i> – R  | TAAAAATCCAATCCGTACATTCAGACACAA |
| <i>MAF2</i> – F | CCTTCAAAAAACGGTGGGGAAG         |
| <i>MAF2</i> – R | CAATTCTTTCTCATGAGCTTCTG        |
| <i>MAF3</i> – F | GAAAGGGAGAAGTTGCTGATAG         |
| <i>MAF3</i> – R | AAGAACTCTGATATTTGTCTACTAAGGTAC |
| <i>MAF4</i> – F | CAATGCAAGATTGAAGAAGCGAAAAGC    |
| <i>MAF4</i> – R | GTGACATTGCTCTTGCATCCTCTG       |
| <i>MAF5</i> – F | TTCCACCGGCAAACCTCTACAACCTC     |
| <i>MAF5</i> – R | CCACCTCGCTAGCTAGAACCTT         |
| <i>SVP</i> – F  | ATCTCTTGAGTTACAGCTGGTTGAGAACA  |
| <i>SVP</i> – R  | ATGCACATTGTTACATATTTGCATGCCAA  |

Cycle parameters were as follows:

94°C for 2:00

94°C for 0:30

gene-specific annealing temp for 0:30 [0:20 for *MAF4*]

72°C for gene-specific extension time

(repeated until total cycle number achieved)

72°C for 8:00

**Table S2.** Gene-specific cycle parameters for semi-quantitative RT-PCR.

| <b>Gene:</b> | <b>Annealing Temp:</b> | <b>Extension Time:</b> | <b>Cycle Number:</b> |
|--------------|------------------------|------------------------|----------------------|
| <i>UBQ</i>   | 63°C                   | 0:30                   | 23x                  |
| <i>FLC</i>   | 63°C                   | 0:30                   | 32x                  |
| <i>FT</i>    | 63°C                   | 0:30                   | 36x                  |
| <i>TSF</i>   | 63°C                   | 0:30                   | 36x                  |
| <i>FLM</i>   | 55°C                   | 0:50                   | 42x                  |
| <i>MAF2</i>  | 61°C                   | 0:20                   | 41x                  |
| <i>MAF3</i>  | 60°C                   | 0:40                   | 37x                  |
| <i>MAF4</i>  | 64°C                   | 0:17                   | 45x                  |
| <i>MAF5</i>  | 60°C                   | 0:30                   | 42x                  |
| <i>SVP</i>   | 60°C                   | 0:30                   | 34x                  |

**Table S3.** Primer sequences for quantitative RT-PCR.

|                |                              |
|----------------|------------------------------|
| <i>UBQ</i> – F | GGCCTTGTATAATCCCTGATGAATAAG  |
| <i>UBQ</i> – R | AAAGAGATAACAGGAACGGAAACATAGT |
| <i>FT</i> – F  | CTCAGGAACTTCTATACTTTGGTTATG  |
| <i>FT</i> – R  | GTTCCAGTTGTACGAGGGATATCAG    |
| <i>CO</i> – F  | CATTAACCATAACGCATACATTTTCATC |
| <i>CO</i> – R  | TCCGGCACAACACCAGTTT          |
| <i>GI</i> – F  | ACTAGCAGTGGTCGACGGTTTATC     |
| <i>GI</i> – R  | GCTGGTAGACGACACTTCAATAGATT   |

Cycle parameters were as follows:

50°C for 2:00

95°C for 15:00

95°C for 0:15

59-61°C for 1:00

(repeated 40x)

Standard dissociation curve to check product specificity
